# Supplementary material
Source: Research Square preprint supplement (doi:10.21203/rs.3.rs-9015910/v1)
Supplement: Supplementary file 1 [file 05490e0d02fbccaf2e2f174d.docx]

Supplementary Data 6 Sequencing summary of transcriptome

| Sample name | Raw reads | Clean reads | Q30 (%) | CG (%) |
| --- | --- | --- | --- | --- |
| Jack-1 | 45443662 | 44129370 | 95.34 | 45.82 |
| Jack-2 | 48285812 | 46731140 | 95.61 | 46.11 |
| Jack-3 | 41203234 | 39099182 | 95.47 | 45.69 |
| *GmRVE4d-OE-1* | 45505786 | 44225272 | 95.87 | 45.44 |
| *GmRVE4d-OE-2* | 42413264 | 40654754 | 91.78 | 45.37 |
| *GmRVE4d-OE-3* | 41911810 | 40402306 | 92.61 | 45.75 |
| *Gmrve4d-1* | 41242800 | 39365760 | 91.78 | 44.67 |
| *Gmrve4d-2* | 39481336 | 38020504 | 91.31 | 45.93 |
| *Gmrve4d-3* | 45406690 | 43682614 | 95.23 | 46.99 |
