# Supplementary material
Source: Research Square preprint supplement (doi:10.21203/rs.3.rs-9015910/v1)
Supplement: Supplementary file 4 [file 79bec715821855bc4c3cbb15.xlsx]

## Sheet: Sheet1
Supplementary Data 7 Primers for this study
Primer name	Forward primer (5'-3')	Purpose
GmRVE4d-F	CTATTCAACTCCAACACGCCC	Primers for gene cloning
GmRVE4d-R	ACCTCGGTCTTCCATCCAAAT	Primers for gene cloning
Glyma.19G177400-qRT-F	ACAAGCCAACGGCAAAACTC	Primers for qRT-PCR
Glyma.19G177400-qRT-R	ATTGGCCTCCATTGGTTGCT	Primers for qRT-PCR
Glyma.19G177500-qRT-F	TGGAATGGTCATGGCTCCAC	Primers for qRT-PCR
Glyma.19G177500-qRT-R	TCCACGGGCTGACTCTTTTC	Primers for qRT-PCR
Glyma.19G177600-qRT-F	TGGGTGAGGATACCACGAGT	Primers for qRT-PCR
Glyma.19G177600-qRT-R	AAATGCCACAACGGCTTTCC	Primers for qRT-PCR
Glyma.19G177700-qRT-F	GAGTGTGATTCACGCCCTCA	Primers for qRT-PCR
Glyma.19G177700-qRT-R	AAACGTGCGAGAACCTCCAT	Primers for qRT-PCR
Glyma.19G177800-qRT-F	TGGCAACACTGAACAGAATGC	Primers for qRT-PCR
Glyma.19G177800-qRT-R	TCCATGTCCAGTTCGCCATC	Primers for qRT-PCR
Glyma.19G178000-qRT-F	AGGGAAACAGGCTCAGGT	Primers for qRT-PCR
Glyma.19G178000-qRT-F	AACGGGCTCAAAGTCAGG	Primers for qRT-PCR
Glyma.19G178100-qRT-F	GACGGGCCTGGACAAGTAAA	Primers for qRT-PCR
Glyma.19G178100-qRT-R	GTTTGGACGGAGACGAGAGG	Primers for qRT-PCR
Glyma.19G178200-qRT-F	GCAACATCCTTCCGTCTGGA	Primers for qRT-PCR
Glyma.19G178200-qRT-R	AGTTGCCCTGCCATAAGGAC	Primers for qRT-PCR
Glyma.19G178300-F	ACGGACTGCTACAGTATGTGGA	Primers for qRT-PCR
Glyma.19G178300-R	CTACTTCGACGGCAGCACAC	Primers for qRT-PCR
GmFT2a-qRT-F	CTTTGATTGCGGTTGATC	Primers for qRT-PCR
GmFT2a-qRT-R	TCCCTACCCAGTTGACGA	Primers for qRT-PCR
GmFT5a-qRT-F	AGCCCGAACCCTTCAGTA	Primers for qRT-PCR
GmFT5a-qRT-R	TCCTTCCACCGCAACCAC	Primers for qRT-PCR
GmACTIN-F	CGGTGGTTCTATCTTGGCATC	Primers for qRT-PCR
GmACTIN-R	GTCTTTCGCTTCAATAACCCTA	Primers for qRT-PCR
GmPRR5a-Chip-F	CCACGTTTGGACGGAATGGA	Primers for qRT-PCR
GmPRR5a-Chip-R	TCAACCTGGCCTTACAACCG	Primers for qRT-PCR
GmRVE4d-OE-F	TGGAGAGAACACGGGGGACTCTAGAATGGCCATGAAGCCCTCAAC	Primers for vector costruction
GmRVE4d-OE-R	CCTCGCCCTTGCTCACCATTCTAGAAGCTGTTTGACATGATAGAT	Primers for vector costruction
GmRVE4d-AD-F	GATTATGCCTCTCCCGAATTCATGGCCATGAAGCCCTCAAC	Primers for vector costruction
GmRVE4d-AD-R	AGAAGTCCAAAGCTTCTCGAGAGCTGTTTGACATGATAGAT	Primers for vector costruction
GmPRR5a-BD-F	CGGAATTCGAGCTCGGTACCAGGAACAAGCGAGCACTG	Primers for vector costruction
GmPRR5a-BD-R	TACAGAGCACATGCCTCGAGCCAACAACTCATCCCACC	Primers for vector costruction
GmRVE4d-SK-F	GTGGATCCCCCGGGCTGCAGATGGCCATGAAGCCCTCAAC	Primers for vector costruction
GmRVE4d-SK-R	CAGCGTACCGAATTGGTACCAGCTGTTTGACATGATAGAT	Primers for vector costruction
GmPRR5a-0800-F	GTCGACGGTATCGATAAGCTTAGGAACAAGCGAGCACTG	Primers for vector costruction
GmPRR5a-0800-R	CGCTCTAGAACTAGTGGATCCCCAACAACTCATCCCACC	Primers for vector costruction
Probe 3’botin	TATCTGCCATCAGAAGATATTTTGTTGGATTTTCG	Primers for identification
Probe 3’botin	CGAAAATCCAACAAAATATCTTCTGATGGCAGATA	Primers for identification
GmRVE4d-OE-J-F	TGGGAACTCTACTAGAAATCTGCC	Primers for identification
GmRVE4d-OE-J-R	CGGTGGTGCAGATGAACT	Primers for identification
GmPRR5a-CRISPR-J-F	TTGGACGGAATGGAATGAG	Primers for identification
GmPRR5a-CRISPR-J-R	ACGAGTGTTGTTACCTTGAT	Primers for identification
GmRVE4d-CRISPR-J-F	AACACGCCCTCCAAGCATA	Primers for identification
GmRVE4d-CRISPR-J-R	TGAACCAGCAAGATGACCAAC	Primers for identification
