# Supplementary material
Source: Research Square preprint supplement (doi:10.21203/rs.3.rs-9015910/v1)
Supplement: Supplementary file 5 [file 82fcb73333f1568dadc6bffd.docx]

Supplementary Data 4 Predicted genes in mapping region (43,672-kb to 43,756-kb) according to *Glycine max* Wm82.a2.v1 reference genome

| Gene ID | Function |
| --- | --- |
| *Glyma.19G177400* | WRKY DNA -binding domain (WRKY) |
| *Glyma.19G177500* | ADENYLATE KINASE 1, MITOCHONDRIAL-RELATED |
| *Glyma.19G177600* | THIOREDOXIN-LIKE PROTEIN AAED1, CHLOROPLASTIC |
| *Glyma.19G177700* | PPR repeat (PPR) // PPR repeat family (PPR_2) |
| *Glyma.19G177800* | ZINC FINGER-CONTAINING PROTEIN P48ZNF |
| *Glyma.19G178000* | PROTEIN REVEILLE 4-RELATED |
| *Glyma.19G178100* | 60S RIBOSOMAL PROTEIN L4 |
| *Glyma.19G178200* | AP2 domain (AP2) |
| *Glyma.19G178300* | RING ZINC FINGER PROTEIN |
