# Supplementary material
Source: Research Square preprint supplement (doi:10.21203/rs.3.rs-9015910/v1)
Supplement: Supplementary file 6 [file 8a15a08b249fa73f2de1a61f.xlsx]

## Sheet: Glyma.19G177400
Cellular Component
GO:0110165 - cellular anatomical structure - 0.595
GO:0005622 - intracellular anatomical structure - 0.590
GO:0043226 - organelle - 0.544
GO:0043229 - intracellular organelle - 0.540
GO:0016020 - membrane - 0.511
GO:0043227 - membrane-bounded organelle - 0.511
GO:0043231 - intracellular membrane-bounded organelle - 0.510
GO:0005634 - nucleus - 0.487
Molecular Function
GO:0005488 - binding - 0.578
GO:0003676 - nucleic acid binding - 0.503
GO:0003677 - DNA binding - 0.483
GO:0003690 - double-stranded DNA binding - 0.482
GO:0043565 - sequence-specific DNA binding - 0.480
GO:1990837 - sequence-specific double-stranded DNA binding - 0.477
GO:0001067 - transcription regulatory region nucleic acid binding - 0.450
GO:0000976 - transcription cis-regulatory region binding - 0.448
Biological Process
GO:0009987 - cellular process - 0.727
GO:0065007 - biological regulation - 0.547
GO:0050789 - regulation of biological process - 0.537
GO:0050896 - response to stimulus - 0.527
GO:0008152 - metabolic process - 0.490
GO:0050794 - regulation of cellular process - 0.475
GO:0043170 - macromolecule metabolic process - 0.475
GO:0009058 - biosynthetic process - 0.469
GO:0009059 - macromolecule biosynthetic process - 0.469
GO:0010467 - gene expression - 0.469
GO:0044238 - primary metabolic process - 0.466
GO:0019222 - regulation of metabolic process - 0.435
GO:0009889 - regulation of biosynthetic process - 0.429
GO:0010468 - regulation of gene expression - 0.427
GO:0010556 - regulation of macromolecule biosynthetic process - 0.427
GO:0060255 - regulation of macromolecule metabolic process - 0.427
GO:0006139 - nucleobase-containing compound metabolic process - 0.426
GO:0034654 - nucleobase-containing compound biosynthetic process - 0.424
GO:0090304 - nucleic acid metabolic process - 0.424
GO:0141187 - nucleic acid biosynthetic process - 0.424
GO:0016070 - RNA metabolic process - 0.418
GO:0032774 - RNA biosynthetic process - 0.418
GO:0080090 - regulation of primary metabolic process - 0.404
GO:0006351 - DNA-templated transcription - 0.402
GO:0019219 - regulation of nucleobase-containing compound metabolic process - 0.399
GO:0051252 - regulation of RNA metabolic process - 0.399
GO:2001141 - regulation of RNA biosynthetic process - 0.399
GO:0006355 - regulation of DNA-templated transcription - 0.397
GO:0042221 - response to chemical - 0.345
GO:0006950 - response to stress - 0.343

## Sheet: Glyma.19G177500
Cellular Component
GO:0005622 - intracellular anatomical structure - 0.696
GO:0110165 - cellular anatomical structure - 0.696
GO:0005737 - cytoplasm - 0.621
GO:0043226 - organelle - 0.575
GO:0043229 - intracellular organelle - 0.575
GO:0016020 - membrane - 0.559
GO:0043227 - membrane-bounded organelle - 0.554
GO:0043231 - intracellular membrane-bounded organelle - 0.550
Molecular Function
GO:0003824 - catalytic activity - 0.553
GO:0016740 - transferase activity - 0.464
GO:0016772 - transferase activity, transferring phosphorus-containing groups - 0.437
GO:0016301 - kinase activity - 0.433
GO:0016776 - phosphotransferase activity, phosphate group as acceptor - 0.425
GO:0019205 - nucleobase-containing compound kinase activity - 0.425
GO:0004017 - AMP kinase activity - 0.373
GO:0050145 - nucleoside monophosphate kinase activity - 0.373
Biological Process
GO:0009987 - cellular process - 0.729
GO:0008152 - metabolic process - 0.633
GO:0044238 - primary metabolic process - 0.602
GO:0006139 - nucleobase-containing compound metabolic process - 0.536
GO:0009058 - biosynthetic process - 0.497
GO:0044281 - small molecule metabolic process - 0.477
GO:0006793 - phosphorus metabolic process - 0.453
GO:0006796 - phosphate-containing compound metabolic process - 0.453
GO:0019637 - organophosphate metabolic process - 0.447
GO:0006753 - nucleoside phosphate metabolic process - 0.443
GO:0055086 - nucleobase-containing small molecule metabolic process - 0.443
GO:0009117 - nucleotide metabolic process - 0.441
GO:0034654 - nucleobase-containing compound biosynthetic process - 0.429
GO:0009123 - nucleoside monophosphate metabolic process - 0.389
GO:0090407 - organophosphate biosynthetic process - 0.379
GO:1901293 - nucleoside phosphate biosynthetic process - 0.376
GO:0009165 - nucleotide biosynthetic process - 0.374
GO:0046940 - nucleoside monophosphate phosphorylation - 0.373

## Sheet: Glyma.19G177600
Cellular Component
GO:0110165 - cellular anatomical structure - 0.812
GO:0005622 - intracellular anatomical structure - 0.729
GO:0005737 - cytoplasm - 0.620
GO:0043226 - organelle - 0.507
GO:0016020 - membrane - 0.505
GO:0043227 - membrane-bounded organelle - 0.505
GO:0043229 - intracellular organelle - 0.504
GO:0043231 - intracellular membrane-bounded organelle - 0.497
Molecular Function
Biological Process
GO:0009987 - cellular process - 0.407
GO:0008152 - metabolic process - 0.325

## Sheet: Glyma.19G177700
Cellular Component
◦ GO:0110165 - cellular anatomical structure - 0.347
◦ GO:0005622 - intracellular anatomical structure - 0.303
Molecular Function
◦ GO:0005488 - binding - 0.755
◦ GO:0003676 - nucleic acid binding - 0.672
◦ GO:0003723 - RNA binding - 0.664
◦ GO:0003729 - mRNA binding - 0.660
Biological Process

## Sheet: Glyma.19G177800
Cellular Component
GO:0110165 - cellular anatomical structure - 0.781
GO:0005622 - intracellular anatomical structure - 0.780
GO:0005737 - cytoplasm - 0.656
GO:0043226 - organelle - 0.486
GO:0043229 - intracellular organelle - 0.486
GO:0016020 - membrane - 0.467
GO:0043227 - membrane-bounded organelle - 0.467
GO:0043231 - intracellular membrane-bounded organelle - 0.450
Molecular Function
GO:0005488 - binding - 0.406
Biological Process
GO:0009987 - cellular process - 0.528
GO:0065007 - biological regulation - 0.418
GO:0008152 - metabolic process - 0.324
GO:0043170 - macromolecule metabolic process - 0.305

## Sheet: Glyma.19G178000
Cellular Component
GO:0110165 - cellular anatomical structure - 0.505
GO:0005622 - intracellular anatomical structure - 0.494
GO:0043226 - organelle - 0.453
GO:0043229 - intracellular organelle - 0.453
GO:0016020 - membrane - 0.443
GO:0043227 - membrane-bounded organelle - 0.443
GO:0043231 - intracellular membrane-bounded organelle - 0.432
GO:0005634 - nucleus - 0.383
Molecular Function
GO:0005488 - binding - 0.522
GO:0003676 - nucleic acid binding - 0.439
GO:0003677 - DNA binding - 0.439
GO:0043565 - sequence-specific DNA binding - 0.434
GO:0003690 - double-stranded DNA binding - 0.331
GO:1990837 - sequence-specific double-stranded DNA binding - 0.325
GO:0001067 - transcription regulatory region nucleic acid binding - 0.317
GO:0000976 - transcription cis-regulatory region binding - 0.317
Biological Process
GO:0009987 - cellular process - 0.845
GO:0008152 - metabolic process - 0.793
GO:0065007 - biological regulation - 0.777
GO:0050789 - regulation of biological process - 0.776
GO:0009058 - biosynthetic process - 0.765
GO:0043170 - macromolecule metabolic process - 0.758
GO:0050794 - regulation of cellular process - 0.751
GO:0009059 - macromolecule biosynthetic process - 0.751
GO:0010467 - gene expression - 0.751
GO:0019222 - regulation of metabolic process - 0.728
GO:0009889 - regulation of biosynthetic process - 0.723
GO:0010556 - regulation of macromolecule biosynthetic process - 0.716
GO:0060255 - regulation of macromolecule metabolic process - 0.716
GO:0010468 - regulation of gene expression - 0.716
GO:0044238 - primary metabolic process - 0.559
GO:0050896 - response to stimulus - 0.511
GO:0006139 - nucleobase-containing compound metabolic process - 0.507
GO:0034654 - nucleobase-containing compound biosynthetic process - 0.504
GO:0090304 - nucleic acid metabolic process - 0.497
GO:0141187 - nucleic acid biosynthetic process - 0.497
GO:0016070 - RNA metabolic process - 0.494
GO:0032774 - RNA biosynthetic process - 0.494
GO:0080090 - regulation of primary metabolic process - 0.493
GO:0032502 - developmental process - 0.490
GO:0006351 - DNA-templated transcription - 0.488
GO:0019219 - regulation of nucleobase-containing compound metabolic process - 0.485
GO:0051252 - regulation of RNA metabolic process - 0.485
GO:0006355 - regulation of DNA-templated transcription - 0.484
GO:2001141 - regulation of RNA biosynthetic process - 0.484
GO:0048856 - anatomical structure development - 0.483
GO:0032501 - multicellular organismal process - 0.476
GO:0007623 - circadian rhythm - 0.473
GO:0048511 - rhythmic process - 0.473
GO:0007275 - multicellular organism development - 0.453
GO:0048731 - system development - 0.423
GO:0022414 - reproductive process - 0.412
GO:0003006 - developmental process involved in reproduction - 0.405
GO:0009791 - post-embryonic development - 0.400
GO:0048608 - reproductive structure development - 0.394
GO:0061458 - reproductive system development - 0.394
GO:0042752 - regulation of circadian rhythm - 0.372
GO:0009628 - response to abiotic stimulus - 0.369
GO:0009314 - response to radiation - 0.355
GO:0009416 - response to light stimulus - 0.352
GO:0050793 - regulation of developmental process - 0.343
GO:0009648 - photoperiodism - 0.339
GO:0010228 - vegetative to reproductive phase transition of meristem - 0.339
GO:0048573 - photoperiodism, flowering - 0.339
GO:0051239 - regulation of multicellular organismal process - 0.336
GO:2000026 - regulation of multicellular organismal development - 0.327
GO:0048367 - shoot system development - 0.325
GO:0048580 - regulation of post-embryonic development - 0.305

## Sheet: Glyma.19G178100
Cellular Component
GO:0110165 - cellular anatomical structure - 0.831
GO:0005622 - intracellular anatomical structure - 0.799
GO:0043226 - organelle - 0.787
GO:0043229 - intracellular organelle - 0.787
GO:0043228 - membraneless organelle - 0.630
GO:0043232 - intracellular membraneless organelle - 0.630
GO:0005737 - cytoplasm - 0.615
GO:0005829 - cytosol - 0.489
GO:0032991 - protein-containing complex - 0.448
GO:0005840 - ribosome - 0.425
GO:0022626 - cytosolic ribosome - 0.421
GO:0016020 - membrane - 0.418
GO:0043227 - membrane-bounded organelle - 0.412
GO:1990904 - ribonucleoprotein complex - 0.405
GO:0043231 - intracellular membrane-bounded organelle - 0.401
GO:0044391 - ribosomal subunit - 0.381
GO:0015934 - large ribosomal subunit - 0.374
GO:0022625 - cytosolic large ribosomal subunit - 0.374
GO:0005634 - nucleus - 0.361
Molecular Function
GO:0005488 - binding - 0.355
GO:0003676 - nucleic acid binding - 0.330
Biological Process
GO:0009987 - cellular process - 0.412
GO:0008152 - metabolic process - 0.334
GO:0044238 - primary metabolic process - 0.317
GO:0009058 - biosynthetic process - 0.316

## Sheet: Glyma.19G178200
Cellular Component
GO:0110165 - cellular anatomical structure - 0.496
GO:0005622 - intracellular anatomical structure - 0.477
GO:0043226 - organelle - 0.430
GO:0043229 - intracellular organelle - 0.430
GO:0016020 - membrane - 0.409
GO:0043227 - membrane-bounded organelle - 0.409
GO:0043231 - intracellular membrane-bounded organelle - 0.409
GO:0005634 - nucleus - 0.346
Molecular Function
GO:0005488 - binding - 0.476
GO:0003676 - nucleic acid binding - 0.385
GO:0003677 - DNA binding - 0.382
GO:0043565 - sequence-specific DNA binding - 0.358
GO:0003690 - double-stranded DNA binding - 0.354
GO:1990837 - sequence-specific double-stranded DNA binding - 0.354
GO:0000976 - transcription cis-regulatory region binding - 0.340
GO:0001067 - transcription regulatory region nucleic acid binding - 0.340
Biological Process
GO:0009987 - cellular process - 0.647
GO:0032502 - developmental process - 0.582
GO:0048856 - anatomical structure development - 0.570
GO:0008152 - metabolic process - 0.554
GO:0032501 - multicellular organismal process - 0.545
GO:0050789 - regulation of biological process - 0.533
GO:0065007 - biological regulation - 0.533
GO:0007275 - multicellular organism development - 0.511
GO:0044238 - primary metabolic process - 0.510
GO:0048731 - system development - 0.474
GO:0009058 - biosynthetic process - 0.473
GO:0043170 - macromolecule metabolic process - 0.466
GO:0050794 - regulation of cellular process - 0.450
GO:0006139 - nucleobase-containing compound metabolic process - 0.432
GO:0009889 - regulation of biosynthetic process - 0.417
GO:0019222 - regulation of metabolic process - 0.417
GO:0009059 - macromolecule biosynthetic process - 0.406
GO:0090304 - nucleic acid metabolic process - 0.395
GO:0009791 - post-embryonic development - 0.389
GO:0010556 - regulation of macromolecule biosynthetic process - 0.384
GO:0060255 - regulation of macromolecule metabolic process - 0.384
GO:0010467 - gene expression - 0.383
GO:0080090 - regulation of primary metabolic process - 0.374
GO:0034654 - nucleobase-containing compound biosynthetic process - 0.369
GO:0010468 - regulation of gene expression - 0.363
GO:0019219 - regulation of nucleobase-containing compound metabolic process - 0.363
GO:0016070 - RNA metabolic process - 0.354
GO:0032774 - RNA biosynthetic process - 0.352
GO:0141187 - nucleic acid biosynthetic process - 0.352
GO:0006351 - DNA-templated transcription - 0.348
GO:0051252 - regulation of RNA metabolic process - 0.345
GO:2001141 - regulation of RNA biosynthetic process - 0.338
GO:0050793 - regulation of developmental process - 0.337
GO:0006355 - regulation of DNA-templated transcription - 0.336
GO:0022414 - reproductive process - 0.329
GO:0003006 - developmental process involved in reproduction - 0.323
GO:0051239 - regulation of multicellular organismal process - 0.322
GO:0061458 - reproductive system development - 0.316
GO:0048608 - reproductive structure development - 0.315
GO:2000026 - regulation of multicellular organismal development - 0.314
GO:0048367 - shoot system development - 0.312
GO:0009908 - flower development - 0.306
GO:0090567 - reproductive shoot system development - 0.306

## Sheet: Glyma.19G178300
Cellular Component
GO:0110165 - cellular anatomical structure - 0.305
Molecular Function
GO:0003824 - catalytic activity - 0.688
GO:0140096 - catalytic activity, acting on a protein - 0.672
GO:0016740 - transferase activity - 0.665
GO:0016746 - acyltransferase activity - 0.664
GO:0016755 - aminoacyltransferase activity - 0.664
GO:0019787 - ubiquitin-like protein transferase activity - 0.663
GO:0004842 - ubiquitin-protein transferase activity - 0.660
Biological Process
GO:0009987 - cellular process - 0.816
GO:0008152 - metabolic process - 0.743
GO:0050896 - response to stimulus - 0.743
GO:0043170 - macromolecule metabolic process - 0.724
GO:0044238 - primary metabolic process - 0.721
GO:0006950 - response to stress - 0.697
GO:0042221 - response to chemical - 0.686
GO:1901700 - response to oxygen-containing compound - 0.674
GO:0019538 - protein metabolic process - 0.672
GO:0033993 - response to lipid - 0.665
GO:0009628 - response to abiotic stimulus - 0.662
GO:0009719 - response to endogenous stimulus - 0.659
GO:0009725 - response to hormone - 0.659
GO:0043412 - macromolecule modification - 0.657
GO:0036211 - protein modification process - 0.657
GO:0009737 - response to abscisic acid - 0.654
GO:0097305 - response to alcohol - 0.654
GO:0001101 - response to acid chemical - 0.654
GO:0009415 - response to water - 0.654
GO:0009414 - response to water deprivation - 0.650
GO:0016567 - protein ubiquitination - 0.650
GO:0032446 - protein modification by small protein conjugation - 0.650
GO:0043687 - post-translational protein modification - 0.650
GO:0051865 - protein autoubiquitination - 0.650
GO:0070647 - protein modification by small protein conjugation or removal - 0.650
