# Supplementary material
Source: Research Square preprint supplement (doi:10.21203/rs.3.rs-9015910/v1)
Supplement: Supplementary file 7 [file c5538ea95db3de54caac6ca5.docx]

Supplementary Data 1 Details of 257 soybean accessions

| Variety | Type | MG | Origin |
| --- | --- | --- | --- |
| BeijiSoja 1 | Wild |  | Heilongjiang, China |
| BeijiSoja 6 | Wild |  | Heilongjiang, China |
| ChuangyeSoja | Wild |  | Heilongjiang, China |
| HeiheSoja | Wild |  | Heilongjiang, China |
| HumaSoja | Wild |  | Heilongjiang, China |
| PanguSoja | Wild |  | Heilongjiang, China |
| ZhangdiyingSoja | Wild |  | Heilongjiang, China |
| BayanSoja | Wild |  | Heilongjiang, China |
| BaiyangdianSoja | Wild |  | Hebei, China |
| GuangxiSoja | Wild |  | Guangxi, China |
| Changjihuangdou | Landrace | Ⅰ | Xinjiang, China |
| Taixingheidou | Landrace | Ⅰ | Jiangsu, China |
| Miquanhuangdou | Landrace | Ⅰ | Xinjiang, China |
| Fengchengniupidou | Landrace | Ⅱ | Jiangxi, China |
| Fengdihuang | Landrace | Ⅱ | Jilin, China |
| Huairouhuangdou | Landrace | Ⅲ | Beijing, China |
| Weiqingdou | Landrace | Ⅲ | Henan, China |
| Heibiqing | Landrace | Ⅲ | Guangdong, China |
| Qunyingdou | Landrace | Ⅲ | Hebei, China |
| Fengshouhuang | Landrace | Ⅲ | Shandong, China |
| Naiyinheidou | Landrace | Ⅳ | Beijing, China |
| Haiyangpamanqing | Landrace | Ⅳ | Shandong, China |
| Liuyuehuang | Landrace | Ⅳ | Henan, China |
| Yunyizao | Landrace | Ⅳ | Henan, China |
| Chenliuniumaohuang | Landrace | Ⅳ | Henan, China |
| Baihuadou | Landrace | Ⅳ | Zhejiang, China |
| Jinjiangdaqingren | Landrace | Ⅳ | Fujian, China |
| Variety | Type | MG | Origin |
| Zigongqingpidou | Landrace | Ⅳ | Sichuan, China |
| Baishuidou | Landrace | Ⅴ | Guizhou, China |
| Yulindahuangdou | Landrace | Ⅴ | Guangxi, China |
| Suidaohuang | Landrace | Ⅴ | Jiangsu, China |
| Juhuangdadou | Landrace | Ⅵ | Guangdong, China |
| Yangchunqingpidou | Landrace | Ⅵ | Guangdong, China |
| Wuhuasiyuehuang | Landrace | Ⅵ | Jiangsu, China |
| Hengyangbayueqing | Landrace | Ⅶ | Hunan, China |
| Jinningdahuangdou | Landrace | Ⅶ | Yunnan, China |
| Pingguohuangdou | Landrace | Ⅶ | Guangxi, China |
| Tongshanbopihuang | Landrace | Ⅶ | Hubei, China |
| Huangfengwo | Landrace | Ⅶ | Hubei, China |
| Shangraodaqingsi | Landrace | Ⅷ | Jiangxi, China |
| Zigongdongdou | Landrace | Ⅷ | Sichuan, China |
| Lanxidaqingdou | Landrace | Ⅷ | Zhejiang, China |
| Jiangledaqingdou | Landrace | Ⅹ | Fujian, China |
| R-4 | Cultivated | 0000 | Russia |
| Star 4-75 | Cultivated | 0000 | Russia |
| Hujiao 07-2123 | Cultivated | 0000 | Inner Mongolia, China |
| Hujiao 07-2479 | Cultivated | 0000 | Inner Mongolia, China |
| Rassvet | Cultivated | 000 | Russia |
| Jug 30 | Cultivated | 000 | Russia |
| Mageva | Cultivated | 000 | Russia |
| R2 | Cultivated | 000 | Russia |
| Paula | Cultivated | 000 | Russia |
| OAC Vision | Cultivated | 000 | Ontario, Canada |
| Maple Presto | Cultivated | 000 | Ontario, Canada |
| Norman | Cultivated | 000 | Minnesota, USA |
| Beihudou | Cultivated | 000 | Heilongjiang, China |
| Variety | Type | MG | Origin |
| Maple Ridge | Cultivated | 00 | Ontario, Canada |
| Canatto | Cultivated | 00 | Ontario, Canada |
| Jim | Cultivated | 00 | North Dakota, USA |
| Daksoy | Cultivated | 00 | North Dakota, USA |
| McCall | Cultivated | 00 | Minnesota, USA |
| Glacier | Cultivated | 00 | Minnesota, USA |
| Agassiz | Cultivated | 00 | Minnesota, USA |
| Hidaka | Cultivated | 00 | Japan |
| Dongnong 41-C | Cultivated | 00 | Heilongjiang, China |
| Heihe 3 | Cultivated | 00 | Heilongjiang, China |
| Beifeng 2 | Cultivated | 00 | Heilongjiang, China |
| Heihe 9 | Cultivated | 00 | Heilongjiang, China |
| Huajiang 1 | Cultivated | 00 | Heilongjiang, China |
| Merit | Cultivated | 0 | Ontario, Canada |
| Barnes | Cultivated | 0 | North Dakota, USA |
| Heihe 51 | Cultivated | 0 | North Dakota, USA |
| Norpro | Cultivated | 0 | North Dakota, USA |
| Council | Cultivated | 0 | North Dakota, USA |
| Prosoy | Cultivated | 0 | North Dakota, USA |
| Sargent | Cultivated | 0 | North Dakota, USA |
| Mengdou 30 | Cultivated | 0 | Inner Mongolia, China |
| Chico | Cultivated | 0 | Minnesota, USA |
| Clay | Cultivated | 0 | Minnesota, USA |
| Wilkin | Cultivated | 0 | Minnesota, USA |
| MN0201 | Cultivated | 0 | Minnesota, USA |
| Simpson | Cultivated | 0 | Minnesota, USA |
| Heihe 18 | Cultivated | 0 | Heilongjiang, China |
| Heihe 27 | Cultivated | 0 | Heilongjiang, China |
| Heihe 43 | Cultivated | 0 | Heilongjiang, China |
| Variety | Type | MG | Origin |
| Beidou 5 | Cultivated | 0 | Heilongjiang, China |
| Fengshou 10 | Cultivated | 0 | Heilongjiang, China |
| Hefeng 25 | Cultivated | 0 | Heilongjiang, China |
| Kexi 283 | Cultivated | 0 | Heilongjiang, China |
| Dawson | Cultivated | 0 | Heilongjiang, China |
| Beifeng 9 | Cultivated | 0 | Heilongjiang, China |
| Dongnong 72-806 | Cultivated | 0 | Heilongjiang, China |
| Fengshou 12 | Cultivated | 0 | Heilongjiang, China |
| Hefeng 35 | Cultivated | 0 | Heilongjiang, China |
| Dongnong 4 | Cultivated | 0 | Heilongjiang, China |
| NE1900 | Cultivated | Ⅰ | Nebraska, USA |
| Evans | Cultivated | Ⅰ | Minnesota, USA |
| Kato | Cultivated | Ⅰ | Minnesota, USA |
| MN1401 | Cultivated | Ⅰ | Minnesota, USA |
| Parker | Cultivated | Ⅰ | Minnesota, USA |
| Granite | Cultivated | Ⅰ | Minnesota, USA |
| Felix | Cultivated | Ⅰ | Michigan, USA |
| Jilin 4 | Cultivated | Ⅰ | Jilin, China |
| Jiti 5 | Cultivated | Ⅰ | Jilin, China |
| Edou 8 | Cultivated | Ⅰ | Hubei, China |
| Suinong 14 | Cultivated | Ⅰ | Heilongjiang, China |
| Heinong 35 | Cultivated | Ⅰ | Heilongjiang, China |
| Suinong 8 | Cultivated | Ⅰ | Heilongjiang, China |
| Hefeng 55 | Cultivated | Ⅰ | Heilongjiang, China |
| Heinong 16 | Cultivated | Ⅰ | Heilongjiang, China |
| Suinong 10 | Cultivated | Ⅰ | Heilongjiang, China |
| Heinong 33 | Cultivated | Ⅰ | Heilongjiang, China |
| Heinong 26 | Cultivated | Ⅰ | Heilongjiang, China |
| Corsoy 79 | Cultivated | Ⅱ | Illinois, USA |
| Variety | Type | MG | Origin |
| Hark | Cultivated | Ⅱ | Iowa, USA |
| Vinton 81 | Cultivated | Ⅱ | Iowa, USA |
| Olympus | Cultivated | Ⅱ | Michigan, USA |
| Century 84 | Cultivated | Ⅱ | Ohio, USA |
| IL1 | Cultivated | Ⅱ | Illinois, USA |
| LN92-12054 | Cultivated | Ⅱ | Illinois, USA |
| LN92-7369 | Cultivated | Ⅱ | Illinois, USA |
| Iroquois | Cultivated | Ⅱ | Illinois, USA |
| Jack | Cultivated | Ⅱ | Illinois, USA |
| Harosoy63 | Cultivated | Ⅱ | Indiana, USA |
| Amsoy | Cultivated | Ⅱ | Iowa, USA |
| Tianlong 1 | Cultivated | Ⅱ | Beijing, China |
| Jidou 7 | Cultivated | Ⅱ | Hebei, China |
| Jilin 13 | Cultivated | Ⅱ | Jilin, China |
| Jilin 20 | Cultivated | Ⅱ | Jilin, China |
| Huangbaozhu | Cultivated | Ⅱ | Jilin, China |
| Jilin 3 | Cultivated | Ⅱ | Jilin, China |
| Jilin 30 | Cultivated | Ⅱ | Jilin, China |
| Zaofeng 1 | Cultivated | Ⅱ | Jilin, China |
| Jiyu 57 | Cultivated | Ⅱ | Jilin, China |
| Changnong 5 | Cultivated | Ⅱ | Jilin, China |
| Jiti 1 | Cultivated | Ⅱ | Jilin, China |
| Jiunong 22 | Cultivated | Ⅱ | Jilin, China |
| Fushou | Cultivated | Ⅱ | Liaoning, China |
| Tiefeng 19 | Cultivated | Ⅱ | Liaoning, China |
| Kaiyu 8 | Cultivated | Ⅱ | Liaoning, China |
| Tiefeng 20 | Cultivated | Ⅱ | Liaoning, China |
| Tiefeng 3 | Cultivated | Ⅱ | Liaoning, China |
| Kaiyu 3 | Cultivated | Ⅱ | Liaoning, China |
| Variety | Type | MG | Origin |
| Kaiyu 10 | Cultivated | Ⅱ | Liaoning, China |
| Qihuang 10 | Cultivated | Ⅱ | Shandong, China |
| Ludou 11 | Cultivated | Ⅱ | Shandong, China |
| Jindou 3 | Cultivated | Ⅱ | Shanxi, China |
| Jindou 2 | Cultivated | Ⅱ | Shanxi, China |
| Dilworth | Cultivated | Ⅲ | Ohio, USA |
| Dennison | Cultivated | Ⅲ | Ohio, USA |
| Kottman | Cultivated | Ⅲ | Ohio, USA |
| Corsica | Cultivated | Ⅲ | Maryland, USA |
| LN89-5699 | Cultivated | Ⅲ | Illinois, USA |
| Will | Cultivated | Ⅲ | Illinois, USA |
| Wayne | Cultivated | Ⅲ | Illinois, USA |
| IL2 | Cultivated | Ⅲ | Illinois, USA |
| Lincoln | Cultivated | Ⅲ | Illinois, USA |
| Fayette | Cultivated | Ⅲ | Illinois, USA |
| Williams 82 | Cultivated | Ⅲ | Illinois, USA |
| KS3494 | Cultivated | Ⅲ | Kansas, USA |
| Zhechun 3 | Cultivated | Ⅲ | Zhejiang, China |
| Jindou 25 | Cultivated | Ⅲ | Shanxi, China |
| Jindou 19 | Cultivated | Ⅲ | Shanxi, China |
| Wenfeng 5 | Cultivated | Ⅲ | Shandong, China |
| Ludou 4 | Cultivated | Ⅲ | Shandong, China |
| Qihuang 34 | Cultivated | Ⅲ | Shandong, China |
| Yanhuang 1 | Cultivated | Ⅲ | Shandong, China |
| Hedou 13 | Cultivated | Ⅲ | Shandong, China |
| Dandou 4 | Cultivated | Ⅲ | Liaoning, China |
| Jin 33 | Cultivated | Ⅲ | Liaoning, China |
| Jin 8-14 | Cultivated | Ⅲ | Liaoning, China |
| Liaodou 15 | Cultivated | Ⅲ | Liaoning, China |
| Variety | Type | MG | Origin |
| Tiefeng 31 | Cultivated | Ⅲ | Liaoning, China |
| Xiangdou 3 | Cultivated | Ⅲ | Hunan, China |
| Handou 5 | Cultivated | Ⅲ | Hebei, China |
| Jidou 12 | Cultivated | Ⅲ | Hebei, China |
| Jidou 17 | Cultivated | Ⅲ | Hebei, China |
| Guichun 1 | Cultivated | Ⅲ | Guangxi, China |
| Zhonghuang 301 | Cultivated | Ⅲ | Beijing, China |
| Zhonghuang 35 | Cultivated | Ⅲ | Beijing, China |
| Zhonghuang 30 | Cultivated | Ⅲ | Beijing, China |
| Kefeng 6 | Cultivated | Ⅲ | Beijing, China |
| Zhongdou 19 | Cultivated | Ⅲ | Beijing, China |
| Zhonghuang 13 | Cultivated | Ⅲ | Beijing, China |
| Zhonghuang 37 | Cultivated | Ⅲ | Beijing, China |
| Zhonghuang 39 | Cultivated | Ⅲ | Beijing, China |
| UA 4805 | Cultivated | Ⅳ | Arkansas, USA |
| Lawrence | Cultivated | Ⅳ | Illinois, USA |
| Omaha | Cultivated | Ⅳ | Illinois, USA |
| Cutler | Cultivated | Ⅳ | Illinois, USA |
| LS92-1800 | Cultivated | Ⅳ | Illinois, USA |
| LD00-2817P | Cultivated | Ⅳ | Illinois, USA |
| Calhoun | Cultivated | Ⅳ | Kentucky, USA |
| CF461 | Cultivated | Ⅳ | Kentucky, USA |
| Pennyrile | Cultivated | Ⅳ | Kentucky, USA |
| CF492 | Cultivated | Ⅳ | Kentucky, USA |
| 77-14 | Cultivated | Ⅳ | Kentucky, USA |
| Flyer | Cultivated | Ⅳ | Ohio, USA |
| Youbian 30 | Cultivated | Ⅳ | Beijing, China |
| Guichun 8 | Cultivated | Ⅳ | Guangxi, China |
| Qiandou 6 | Cultivated | Ⅳ | Guizhou, China |
| Variety | Type | MG | Origin |
| Bahong 1 | Cultivated | Ⅳ | Hebei, China |
| Zheng 92116 | Cultivated | Ⅳ | Henan, China |
| Xudou 5 | Cultivated | Ⅳ | Jiangsu, China |
| 58-161 | Cultivated | Ⅳ | Jiangsu, China |
| Tiefeng 29 | Cultivated | Ⅳ | Liaoning, China |
| Dandou 1 | Cultivated | Ⅳ | Liaoning, China |
| Yuejin 4 | Cultivated | Ⅳ | Shandong, China |
| Jindou 1 | Cultivated | Ⅳ | Shanxi, China |
| Jindou 23 | Cultivated | Ⅳ | Shanxi, China |
| Taiwan 75 | Cultivated | Ⅳ | Taiwan, China |
| Hutcheson | Cultivated | Ⅴ | Virginia, USA |
| Essex | Cultivated | Ⅴ | Virginia, USA |
| Dare | Cultivated | Ⅴ | North Carolina, USA |
| Nathan | Cultivated | Ⅴ | Mississippi, USA |
| Bedford | Cultivated | Ⅴ | Mississippi, USA |
| R01-3474F | Cultivated | Ⅴ | Arkansas, USA |
| TN04-5321 | Cultivated | Ⅴ | Tennessee, USA |
| Edou 2 | Cultivated | Ⅴ | Hubei, China |
| Houzimao | Cultivated | Ⅴ | Hubei, China |
| TN03-350 | Cultivated | Ⅵ | Tennessee, USA |
| Dillon | Cultivated | Ⅵ | South Carolina, USA |
| Holladay | Cultivated | Ⅵ | North Carolina, USA |
| Hood | Cultivated | Ⅵ | Mississippi, USA |
| Tracy | Cultivated | Ⅵ | Mississippi, USA |
| Centennial | Cultivated | Ⅵ | Mississippi, USA |
| R01-2731F | Cultivated | Ⅵ | Arkansas, USA |
| Lonoke | Cultivated | Ⅵ | Arkansas, USA |
| Rhodes | Cultivated | Ⅵ | Arkansas, USA |
| NC-Roy | Cultivated | Ⅵ | Mississippi, USA |
| Variety | Type | MG | Origin |
| D95-6271 | Cultivated | Ⅵ | Georgia, USA |
| G01-PR16 | Cultivated | Ⅵ | Georgia, USA |
| Suxie 1 | Cultivated | Ⅵ | Jiangsu, China |
| Lee | Cultivated | Ⅶ | Mississippi, USA |
| Boggs | Cultivated | Ⅶ | Georgia, USA |
| Braxton | Cultivated | Ⅶ | Mississippi, USA |
| Motte | Cultivated | Ⅶ | South Carolina, USA |
| Dowling | Cultivated | Ⅷ | Mississippi, USA |
| Benning | Cultivated | Ⅷ | Georgia, USA |
| Prichard | Cultivated | Ⅷ | Georgia, USA |
| Cook | Cultivated | Ⅷ | Georgia, USA |
| Santee | Cultivated | Ⅷ | South Carolina, USA |
| Maxcy | Cultivated | Ⅷ | South Carolina, USA |
| Nandou 12 | Cultivated | Ⅷ | Sichuan, China |
| Qiudou 1 | Cultivated | Ⅷ | Zhejiang, China |
| Jupiter | Cultivated | Ⅸ | Florida, USA |
| Alamo | Cultivated | Ⅸ | Florida, USA |
| Jupiter-R | Cultivated | Ⅸ | Florida, USA |
| FT-4 | Cultivated | Ⅸ | Brazil |
| FT-15 | Cultivated | Ⅸ | Brazil |
| UFV-3 | Cultivated | Ⅸ | Brazil |
| IAC-8 | Cultivated | Ⅸ | Brazil |
| UFV-8 | Cultivated | Ⅸ | Brazil |
| CIGRAS-51 | Cultivated | Ⅸ | Costa Rica |
| Huaxia 3 | Cultivated | Ⅸ | Guangdong, China |
| CIGRAS-06 | Cultivated | Ⅹ | Costa Rica |
| I.C. 192 | Cultivated | Ⅹ | Bihar, India |

Note: Maturity group (MG).
